# Supplementary material for: X-ray wavefunction refinement and comprehensive structural studies on bromo-substituted analogues of 2-deoxy-d-glucose in solid state and solution
Source: Royal Society of Chemistry journal article supplement (doi:10.1039/d1ra08312k), 2022-01-01
Supplement: d1ra08312k1.pdf [file d1ra08312k1.pdf]

## Supporting information for X-ray wavefunction refinement and comprehensive structural studies on bromo-substituted analogues of 2-deoxy-D-glucose in solid state and solution

Marcin Ziemiak\*, Sylwia Pawłędzio, Anna Zawadzka-Kaźmierczuk, Paulina M. Dominiak, Damian Trzybiński, Wiktor Koźmiński, Rafał Zieliński, Izabela Fokt, Waldemar Priebe, Krzysztof Woźniak\*, Beata Pająk\*

**Table S1.** Crystal data and structure refinement details for investigated compounds.

|                                             |                                                               |                                                   |                                                   |
|---------------------------------------------|---------------------------------------------------------------|---------------------------------------------------|---------------------------------------------------|
| Compound                                    | 2-BG                                                          | 2-BM                                              | sucrose                                           |
| Empirical formula                           | C <sub>6</sub> H <sub>11</sub> BrO <sub>5</sub>               | C <sub>6</sub> H <sub>11</sub> BrO <sub>5</sub>   | C <sub>12</sub> H <sub>22</sub> O <sub>11</sub>   |
| Formula weight                              | 243.055                                                       | 243.055                                           | 342.302                                           |
| Temperature/K                               | 100                                                           | 99.99(10)                                         | 100                                               |
| Crystal system                              | orthorhombic                                                  | monoclinic                                        | monoclinic                                        |
| Space group                                 | P2 <sub>1</sub> 2 <sub>1</sub> 2 <sub>1</sub>                 | P2 <sub>1</sub>                                   | P2 <sub>1</sub>                                   |
| a/Å                                         | 6.8069(3)                                                     | 8.0544(8)                                         | 7.7727(9)                                         |
| b/Å                                         | 6.8839(3)                                                     | 10.3670(7)                                        | 8.7216(11)                                        |
| c/Å                                         | 17.1166(10)                                                   | 10.0444(8)                                        | 10.8637(11)                                       |
| α/°                                         | 90                                                            | 90                                                | 90                                                |
| β/°                                         | 90                                                            | 90.784(8)                                         | 102.983(11)                                       |
| γ/°                                         | 90                                                            | 90                                                | 90                                                |
| Volume/Å <sup>3</sup>                       | 802.06(7)                                                     | 838.63(12)                                        | 717.63(15)                                        |
| Z                                           | 4                                                             | 4                                                 | 2                                                 |
| ρ <sub>calc</sub> /cm <sup>3</sup>          | 2.013                                                         | 1.925                                             | 1.584                                             |
| μ/mm <sup>-1</sup>                          | 6.915                                                         | 6.614                                             | 0.142                                             |
| F(000)                                      | 486.9                                                         | 486.9                                             | 364.3                                             |
| Crystal size/mm <sup>3</sup>                | 0.041 × 0.04 × 0.017                                          | 0.16 × 0.049 × 0.035                              | nd.                                               |
| Radiation                                   | Cu Kα (λ = 1.54184)                                           | Cu Kα (λ = 1.54184)                               | Mo Kα (λ = 0.71073 Å)                             |
| 2θ range for data collection/°              | 10.34 to 134.16                                               | 8.8 to 134.14°                                    | 5.38 to 58.42°                                    |
| Index ranges                                | -8 ≤ h ≤ 7, -8 ≤ k ≤ 5, -20 ≤ l ≤ 19                          | -9 ≤ h ≤ 8, -12 ≤ k ≤ 12, -11 ≤ l ≤ 11            | -10 ≤ h ≤ 10, -11 ≤ k ≤ 9, -14 ≤ l ≤ 14           |
| Reflections collected                       | 2663                                                          | 11095                                             | 13618                                             |
| Independent reflections                     | 1437 [R <sub>int</sub> = 0.0496, R <sub>sigma</sub> = 0.0710] | 2982[R(int) = 0.0626]                             | 3318[R(int) = 0.0339]                             |
| Data/restraints/parameters                  | 1437/3/139                                                    | 2982/21/267                                       | 3318/1/400                                        |
| Goodness-of-fit on F <sup>2</sup>           | 0.948                                                         | 1.050                                             | 1.093                                             |
| Final R indexes [I ≥ 2σ(I)]                 | R <sub>1</sub> = 0.0366, wR <sub>2</sub> = 0.0796             | R <sub>1</sub> = 0.0790, wR <sub>2</sub> = 0.2258 | R <sub>1</sub> = 0.0238, wR <sub>2</sub> = 0.0395 |
| Final R indexes [all data]                  | R <sub>1</sub> = 0.0425, wR <sub>2</sub> = 0.0838             | R <sub>1</sub> = 0.0811, wR <sub>2</sub> = 0.2285 | R <sub>1</sub> = 0.0289, wR <sub>2</sub> = 0.0410 |
| Largest diff. peak/hole / e Å <sup>-3</sup> | 0.53/-0.51                                                    | 2.60/-1.61                                        | 0.12/-0.14                                        |
| Flack parameter                             | -0.06(4)                                                      | -0.01(5)                                          | 0.1(8)                                            |

**Table S2.** Bond lengths for 2-BG

| Atom | Atom | Length/Å | Atom | Atom | Length/Å |
|------|------|----------|------|------|----------|
| Br1  | C2   | 1.955(5) | C3   | O2   | 1.422(6) |
| C1   | C2   | 1.531(7) | C4   | C5   | 1.536(7) |
| C1   | O1   | 1.377(6) | C4   | O3   | 1.432(6) |
| C1   | O5   | 1.426(6) | C5   | C6   | 1.511(7) |
| C2   | C3   | 1.518(7) | C5   | O5   | 1.432(6) |
| C3   | C4   | 1.531(7) | C6   | O6   | 1.426(7) |

**Table S3.** Values of valence angles for 2-BG

| Atom | Atom | Atom | Angle/°  | Atom | Atom | Atom | Angle/°  |
|------|------|------|----------|------|------|------|----------|
| O1   | C1   | C2   | 113.9(4) | C5   | C4   | C3   | 109.5(4) |
| O5   | C1   | C2   | 107.9(4) | O3   | C4   | C3   | 109.7(4) |
| O5   | C1   | O1   | 109.1(4) | O3   | C4   | C5   | 107.3(4) |
| C1   | C2   | Br1  | 109.2(3) | C6   | C5   | C4   | 113.2(4) |

| Atom | Atom | Atom | Angle/°  | Atom | Atom | Atom | Angle/°  |
|------|------|------|----------|------|------|------|----------|
| C3   | C2   | Br1  | 109.1(3) | O5   | C5   | C4   | 107.4(4) |
| C3   | C2   | C1   | 112.4(4) | O5   | C5   | C6   | 109.0(4) |
| C4   | C3   | C2   | 110.5(4) | O6   | C6   | C5   | 115.3(4) |
| O2   | C3   | C2   | 108.9(4) | C5   | O5   | C1   | 111.7(4) |
| O2   | C3   | C4   | 110.0(4) |      |      |      |          |

**Table S4.** Values of torsion angles for 2-BG

| A   | B  | C  | D  | Angle/°   | A  | B  | C  | D  | Angle/°   |
|-----|----|----|----|-----------|----|----|----|----|-----------|
| Br1 | C2 | C1 | O1 | -62.8(4)  | C1 | O5 | C5 | C6 | -167.9(4) |
| Br1 | C2 | C1 | O5 | 175.9(3)  | C2 | C3 | C4 | C5 | 51.3(5)   |
| Br1 | C2 | C3 | C4 | -170.6(3) | C2 | C3 | C4 | O3 | 168.8(4)  |
| Br1 | C2 | C3 | O2 | 68.4(3)   | C3 | C4 | C5 | C6 | 179.7(4)  |
| C1  | C2 | C3 | C4 | -49.3(5)  | C3 | C4 | C5 | O5 | -59.9(4)  |
| C1  | C2 | C3 | O2 | -170.2(4) | C4 | C5 | C6 | O6 | 55.4(5)   |
| C1  | O5 | C5 | C4 | 69.1(4)   |    |    |    |    |           |

**Table S5.** Bond lengths for 2-BM

| Atom | Atom | Length/Å  | Atom | Atom | Length/Å  |
|------|------|-----------|------|------|-----------|
| Br1A | C2A  | 1.950(14) | Br1B | C2B  | 1.960(14) |
| C1A  | C2A  | 1.51(2)   | C1B  | C2B  | 1.54(2)   |
| C1A  | O1A  | 1.372(17) | C1B  | O1B  | 1.402(16) |
| C1A  | O5A  | 1.406(18) | C1B  | O5B  | 1.409(16) |
| C2A  | C3A  | 1.531(18) | C2B  | C3B  | 1.509(16) |
| C3A  | C4A  | 1.53(2)   | C3B  | C4B  | 1.520(19) |
| C3A  | O3A  | 1.382(16) | C3B  | O3B  | 1.407(16) |
| C4A  | C5A  | 1.543(18) | C4B  | C5B  | 1.516(18) |
| C4A  | O4A  | 1.446(14) | C4B  | O4B  | 1.433(15) |
| C5A  | C6A  | 1.516(19) | C5B  | C6B  | 1.55(2)   |
| C5A  | O5A  | 1.426(17) | C5B  | O5B  | 1.405(15) |
| C6A  | O6A  | 1.414(17) | C6B  | O6B  | 1.416(18) |

**Table S6.** Values of valence angles for 2-BM

| Atom | Atom | Atom | Angle/°   | Atom | Atom | Atom | Angle/°   |
|------|------|------|-----------|------|------|------|-----------|
| O1A  | C1A  | C2A  | 111.3(12) | O1B  | C1B  | C2B  | 108.5(11) |
| O5A  | C1A  | C2A  | 111.2(11) | O5B  | C1B  | C2B  | 110.6(10) |
| O5A  | C1A  | O1A  | 107.7(12) | O5B  | C1B  | O1B  | 109.9(11) |
| C1A  | C2A  | Br1A | 111.5(9)  | C1B  | C2B  | Br1B | 110.3(9)  |
| C3A  | C2A  | Br1A | 110.2(9)  | C3B  | C2B  | Br1B | 111.7(9)  |
| C3A  | C2A  | C1A  | 110.0(12) | C3B  | C2B  | C1B  | 112.7(11) |
| C4A  | C3A  | C2A  | 110.6(10) | C4B  | C3B  | C2B  | 110.0(11) |
| O3A  | C3A  | C2A  | 111.2(11) | O3B  | C3B  | C2B  | 115.0(11) |
| O3A  | C3A  | C4A  | 112.0(11) | O3B  | C3B  | C4B  | 108.3(10) |
| C5A  | C4A  | C3A  | 114.3(11) | C5B  | C4B  | C3B  | 110.0(11) |
| O4A  | C4A  | C3A  | 110.8(10) | O4B  | C4B  | C3B  | 110.4(11) |
| O4A  | C4A  | C5A  | 108.8(11) | O4B  | C4B  | C5B  | 108.0(10) |
| C6A  | C5A  | C4A  | 111.7(12) | C6B  | C5B  | C4B  | 112.1(11) |
| O5A  | C5A  | C4A  | 111.5(11) | O5B  | C5B  | C4B  | 112.8(10) |
| O5A  | C5A  | C6A  | 105.4(11) | O5B  | C5B  | C6B  | 106.2(11) |
| O6A  | C6A  | C5A  | 110.4(11) | O6B  | C6B  | C5B  | 110.5(11) |
| C5A  | O5A  | C1A  | 112.0(10) | C5B  | O5B  | C1B  | 114.2(10) |

**Table S7.** Values of torsion angles for 2-BM

| A    | B   | C   | D   | Angle/°    | A    | B   | C   | D   | Angle/°    |
|------|-----|-----|-----|------------|------|-----|-----|-----|------------|
| Br1A | C2A | C1A | O1A | 58.2(10)   | Br1B | C2B | C1B | O1B | 165.7(8)   |
| Br1A | C2A | C1A | O5A | -61.9(10)  | Br1B | C2B | C1B | O5B | -73.7(9)   |
| Br1A | C2A | C3A | C4A | 74.7(10)   | Br1B | C2B | C3B | C4B | 74.3(10)   |
| Br1A | C2A | C3A | O3A | -50.4(9)   | Br1B | C2B | C3B | O3B | -48.2(11)  |
| C1A  | C2A | C3A | C4A | -48.7(11)  | C1B  | C2B | C3B | C4B | -50.5(13)  |
| C1A  | C2A | C3A | O3A | -173.8(11) | C1B  | C2B | C3B | O3B | -173.0(11) |
| C1A  | O5A | C5A | C4A | 56.8(11)   | C1B  | O5B | C5B | C4B | 59.2(11)   |
| C1A  | O5A | C5A | C6A | 178.3(12)  | C1B  | O5B | C5B | C6B | -177.7(11) |
| C2A  | C3A | C4A | C5A | 42.8(12)   | C2B  | C3B | C4B | C5B | 51.3(11)   |
| C2A  | C3A | C4A | O4A | 166.3(10)  | C2B  | C3B | C4B | O4B | 170.3(11)  |
| C3A  | C4A | C5A | C6A | -163.9(11) | C3B  | C4B | C5B | C6B | -175.4(11) |
| C3A  | C4A | C5A | O5A | -46.2(11)  | C3B  | C4B | C5B | O5B | -55.6(11)  |
| C4A  | C5A | C6A | O6A | 58.5(12)   | C4B  | C5B | C6B | O6B | 60.1(11)   |

**Table S8.** Bond lengths for sucrose

| Atom | Atom | Length/Å   | Atom | Atom | Length/Å   |
|------|------|------------|------|------|------------|
| O1   | C1   | 1.4420(16) | O11  | C6   | 1.4226(13) |
| O1   | C6   | 1.4137(13) | O11  | C7   | 1.4343(15) |
| O2   | C2   | 1.4215(18) | C1   | C2   | 1.5243(17) |
| O3   | C3   | 1.4126(17) | C1   | C3   | 1.5287(18) |
| O4   | C4   | 1.4296(16) | C3   | C4   | 1.5279(16) |
| O5   | C5   | 1.4233(15) | C4   | C5   | 1.5236(19) |
| O6   | C7   | 1.4078(13) | C5   | C6   | 1.5354(17) |
| O6   | C11  | 1.4478(14) | C7   | C8   | 1.5267(15) |
| O7   | C12  | 1.423(2)   | C7   | C9   | 1.5418(15) |
| O8   | C10  | 1.4206(15) | C9   | C10  | 1.5244(16) |
| O9   | C9   | 1.4032(16) | C10  | C11  | 1.5253(18) |
| O10  | C8   | 1.4239(18) | C11  | C12  | 1.5168(16) |

**Table S9.** Values of valence angles for sucrose

| Atom | Atom | Atom | Angle/°    | Atom | Atom | Atom | Angle/°    |
|------|------|------|------------|------|------|------|------------|
| C6   | O1   | C1   | 116.00(9)  | C5   | C6   | O11  | 110.18(9)  |
| C11  | O6   | C7   | 111.85(8)  | O11  | C7   | O6   | 110.92(8)  |
| C7   | O11  | C6   | 114.13(9)  | C8   | C7   | O6   | 107.30(10) |
| C2   | C1   | O1   | 105.79(11) | C8   | C7   | O11  | 109.96(10) |
| C3   | C1   | O1   | 110.64(10) | C9   | C7   | O6   | 105.04(9)  |
| C3   | C1   | C2   | 112.15(11) | C9   | C7   | O11  | 108.20(10) |
| C1   | C2   | O2   | 111.48(11) | C9   | C7   | C8   | 115.32(9)  |
| C1   | C3   | O3   | 106.06(11) | C7   | C8   | O10  | 111.06(12) |
| C4   | C3   | O3   | 112.46(11) | C7   | C9   | O9   | 115.73(11) |
| C4   | C3   | C1   | 110.55(11) | C10  | C9   | O9   | 115.67(11) |
| C3   | C4   | O4   | 107.80(11) | C10  | C9   | C7   | 102.56(9)  |
| C5   | C4   | O4   | 111.55(11) | C9   | C10  | O8   | 112.44(10) |
| C5   | C4   | C3   | 108.29(10) | C11  | C10  | O8   | 111.71(12) |
| C4   | C5   | O5   | 110.25(10) | C11  | C10  | C9   | 102.43(10) |
| C6   | C5   | O5   | 110.32(10) | C10  | C11  | O6   | 105.46(10) |
| C6   | C5   | C4   | 110.95(10) | C12  | C11  | O6   | 109.84(10) |
| O11  | C6   | O1   | 110.24(9)  | C12  | C11  | C10  | 114.86(11) |
| C5   | C6   | O1   | 110.94(10) | C11  | C12  | O7   | 112.88(12) |

**Table S10.** Values of torsion angles for sucrose

| A B C        | D   | Angle/°     | A B C D        | Angle/°     |
|--------------|-----|-------------|----------------|-------------|
| O1 C1 C2     | O2  | 56.59(11)   | O6 C11 C10 O8  | 147.84(9)   |
| O1 C1 C3     | O3  | 177.27(10)  | O6 C11 C10 C9  | 27.28(10)   |
| O1 C1 C3     | C4  | 55.10(10)   | O6 C11 C12 O7  | 69.26(12)   |
| O1 C6 O11    | C7  | -108.04(11) | O7 C12 C11 C10 | -49.40(13)  |
| O1 C6 C5     | O5  | -177.17(10) | O8 C10 C9 O9   | 78.12(13)   |
| O1 C6 C5     | C4  | -54.69(10)  | O8 C10 C9 C7   | -154.97(12) |
| O2 C2 C1     | C3  | -64.12(15)  | O8 C10 C11 C12 | -91.08(11)  |
| O3 C3 C1     | C2  | -64.87(12)  | O9 C9 C7 O11   | 39.17(10)   |
| O3 C3 C4     | O4  | 64.32(12)   | O9 C9 C7 C8    | -84.41(12)  |
| O3 C3 C4     | C5  | -174.85(11) | O9 C9 C10 C11  | -161.83(12) |
| O4 C4 C3     | C1  | -177.34(10) | O10 C8 C7 O11  | -50.56(11)  |
| O4 C4 C5     | O5  | -62.94(10)  | O10 C8 C7 C9   | 72.09(12)   |
| O4 C4 C5     | C6  | 174.54(9)   | O11 C6 C5 C4   | 67.67(11)   |
| O5 C5 C4     | C3  | 178.59(10)  | O11 C7 C9 C10  | -87.70(10)  |
| O5 C5 C6     | O11 | -54.81(11)  | C1 C3 C4 C5    | -56.51(11)  |
| O6 C7 O11    | C6  | 44.94(10)   | C3 C4 C5 C6    | 56.07(10)   |
| O6 C7 C8     | O10 | -171.28(9)  | C7 C9 C10 C11  | -34.92(11)  |
| O6 C7 C9     | O9  | 157.70(9)   | C9 C10 C11 C12 | 148.36(11)  |
| O6 C7 C9 C10 |     | 30.83(10)   |                |             |

**Table S11.** Cremer-Pople parameters for crystal structures

| Compound                | $q_2$ | $q_3$ | $Q$   | $\theta$ [°] | $\varphi_2$ [°] |
|-------------------------|-------|-------|-------|--------------|-----------------|
| $\alpha$ -2-DG          | 0.060 | 0.548 | 0.551 | 6.0          | 256.0           |
| $\beta$ -2-DG           | 0.038 | 0.562 | 0.563 | 3.9          | 350.4           |
| 2-BG                    | 0.092 | 0.587 | 0.594 | 9.0          | 335.0           |
| 2-BM ( $\alpha$ anomer) | 0.109 | 0.527 | 0.538 | 11.6         | 51.7            |
| 2-BM ( $\beta$ anomer)  | 0.019 | 0.532 | 0.533 | 2.2          | 280.4           |
| sucrose (pentose)       | 0.351 | -     | -     | -            | -               |
| sucrose (hexose)        | 0.052 | 0.556 | 0.558 | 5.3          | 172.6           |
| 4-BS (pentose)          | 0.400 | -     | -     | -            | -               |
| 4-BS (hexose)           | 0.116 | 0.588 | 0.599 | 11.2         | 296.1           |

**Table S12.** The geometry of hydrogen bonds in the crystal of 2-BG

| D-H    | A   | Symmetry operation | D-H (Å)  | d(D...A) (Å) | < D-H...A (°) |
|--------|-----|--------------------|----------|--------------|---------------|
| O1-H1A | O2  | -1/2+x,3/2-y,1-z   | 0.83(7)  | 2.717(5)     | 146(8)        |
| O2-H2A | O6  | 1+x,y,z            | 0.97(6)  | 2.702(5)     | 169(7)        |
| O3-H3A | Br1 | x,-1+y,z           | 0.97(7)  | 3.388(4)     | 168(5)        |
| O6-H6  | O1  | x,-1+y,z           | 0.98(8)  | 2.810(5)     | 168(7)        |
| C2-H2  | O2  | -1/2+x,3/2-y,1-z   | 0.981(7) | 3.270(6)     | 129.3(5)      |
| C5-H5  | O3  | 1-x,1/2+y,1/2-z    | 0.981(7) | 3.494(6)     | 165(3)        |
| C6-H6B | O5  | 1-x,1/2+y,1/2-z    | 1.12(7)  | 3.322(6)     | 123(4)        |

**Table S13.** The geometry of hydrogen bonds in the crystal of 2-BM

| D-H      | A   | Symmetry operation | D-H (Å)  | d(D...A) (Å) | < D-H...A (°) |
|----------|-----|--------------------|----------|--------------|---------------|
| O1A-H1AA | O6B | x,y,-1+z           | 0.99(15) | 2.611(14)    | 155(-1)       |
| O3A-H3AA | O3B | 1-x,1/2+y,-z       | 1.0(2)   | 2.750(13)    | 104(13)       |
| O4A-H4AA | O5A | 1-x,1/2+y,-z       | 0.97(13) | 2.891(13)    | 143(-1)       |
| O4A-H4AA | O6A | 1-x,1/2+y,-z       | 0.97(13) | 3.227(14)    | 139(11)       |

|          |      |               |          |           |         |
|----------|------|---------------|----------|-----------|---------|
| O6A-H6A  | O1B  | 1-x,-1/2+y,-z | 0.9(2)   | 2.861(14) | 177(-1) |
| O6B-H6B  | O5B  |               | 0.82(11) | 2.815(13) | 102(13) |
| O1B-H1BA | O3A  | -1+x,y,1+z    | 0.82(13) | 2.783(14) | 158(10) |
| O3B-H3BA | O1A  | -1+x,y,z      | 0.98(16) | 2.724(14) | 134(15) |
| O4B-H4BA | O4A  | 1-x,-1/2+y,-z | 1.0(2)   | 2.646(15) | 164(-1) |
| C6A-H6AB | Br1A | 1-x,1/2+y,-z  | 1.09(13) | 3.664(14) | 130(9)  |
| C2B-H2B  | O6B  | -1+x,y,z      | 1.09(5)  | 3.521(17) | 172(16) |
| C3A-H3A  | O6A  | 1-x,1/2+y,-z  | 1.09(6)  | 3.362(16) | 157(11) |
| C4A-H4A  | O6A  |               | 0.98(10) | 2.914(16) | 111(10) |
| C4B-H4B  | O6B  |               | 0.98(19) | 2.952(17) | 1.3(12) |
| C6B-H6BB | O4B  |               | 1.08(13) | 2.944(18) | 103(10) |

**Table S14.** The geometry of hydrogen bonds in the crystal of sucrose

| D-H       | A   | Symmetry operation | D-H (Å)   | d(D...A) (Å) | < D-H...A (°) |
|-----------|-----|--------------------|-----------|--------------|---------------|
| O2--H2    | O4  | -x,-1/2+y,-2-z     | 1.04(3)   | 2.8465(17)   | 159(3)        |
| O3--H3    | O4  |                    | 0.98(3)   | 2.8792(18)   | 100(2)        |
| O3--H3    | O6  | x,1+y,z            | 0.98(3)   | 2.8421(16)   | 121(2)        |
| O3--H3    | O2  | -x,1/2+y,-2-z      | 0.98(3)   | 3.3729(18)   | 143(2)        |
| O4--H4    | O9  | -x,1/2+y,-1-z      | 0.97(2)   | 2.8639(15)   | 172.6(19)     |
| O5--H5    | O7  | -1+x,y,z           | 0.97(2)   | 2.8654(16)   | 170(2)        |
| O7--H7    | O1  |                    | 1.04(3)   | 2.8524(14)   | 164(3)        |
| O8--H8    | O10 | 1+x,y,z            | 0.95(2)   | 2.7198(16)   | 166.5(18)     |
| O9--H9    | O8  | 1-x,1/2+y,-1-z     | 0.91(2)   | 2.8749(16)   | 169.7(18)     |
| O10--H10  | O5  |                    | 0.94(2)   | 2.7818(16)   | 160(2)        |
| O10--H10  | O11 |                    | 0.94(2)   | 2.7743(14)   | 100.1(17)     |
| C1--H1    | O8  | 1-x,1/2+y,-1-z     | 1.135(12) | 3.6792(16)   | 163.7(10)     |
| C2--H2A   | O7  |                    | 1.165(17) | 3.309(2)     | 130.3(11)     |
| C2--H2B   | O3  |                    | 1.089(17) | 2.903(2)     | 100.6(10)     |
| C4--H4B   | O10 | -x,1/2+y,-1-z      | 1.106(14) | 3.5150(17)   | 163.8(12)     |
| C6--H6    | O2  | -x,-1/2+y,-2-z     | 1.083(17) | 3.3560(19)   | 163.8(12)     |
| C8--H8B   | O2  | -x,-1/2+y,-2-z     | 1.070(15) | 3.4690(17)   | 156.5(12)     |
| C9--H9B   | O5  | -x,-1/2+y,-1-z     | 1.073(16) | 3.4648(17)   | 158.7(11)     |
| C10--H10B | O7  |                    | 1.094(17) | 2.9364(16)   | 105.3(10)     |
| C12--H12A | O3  | x,-1+y,z           | 1.109(19) | 3.313(2)     | 124.1(11)     |
| C12--H12B | O2  | 1-x,-1/2+y,-2-z    | 1.114(16) | 3.2221(19)   | 120.2(11)     |

**Table S15.** The geometry of hydrogen bonds in the crystal of 4-BS (upon geometry optimization)

| D-H      | A   | Symmetry operation | D-H (Å) | d(D...A) (Å) | < D-H...A (°) |
|----------|-----|--------------------|---------|--------------|---------------|
| O2--H1   | O5  | 1/2-x,-1-y,-1/2+z  | 1.00    | 2.6494(1)    | 166           |
| O3--H2   | O10 | -1/2+x,-1/2-y,-1-z | 0.99    | 2.6964(1)    | 169           |
| O5--H3   | O7  | -1/2+x,-1/2-y,-z   | 1.00    | 2.6516(1)    | 173           |
| O6--H4   | O2  | 1/2+x,-1/2-y,-1-z  | 0.99    | 2.7157(1)    | 173           |
| O7--H5   | O3  | 1+x,y,z            | 0.99    | 2.7892(1)    | 170           |
| O9--H6   | O1  | 1-x,-1/2+y,-1/2-z  | 0.99    | 3.1442(1)    | 123           |
| O9--H6   | O6  | 1-x,-1/2+y,-1/2-z  | 0.99    | 2.7462(1)    | 162           |
| O10--H7  | O2  |                    | 0.98    | 2.8587(1)    | 162           |
| C2--H9   | Br1 | -x,-1/2+y,-1/2-z   | 1.09    | 3.6773(1)    | 140           |
| C3--H10  | O9  | 1-x,1/2+y,-1/2-z   | 1.09    | 3.2959(1)    | 159           |
| C5--H12  | O1  |                    | 1.09    | 2.8024(1)    | 100           |
| C6--H14  | Br1 | -1/2+x -1/2-y ,-z  | 1.09    | 3.3149(1)    | 103           |
| C10--H17 | Br1 | 1-x,-1/2+y,-1/2-z  | 1.09    | 3.6549(1)    | 150           |
| C11--H19 | O4  |                    | 1.09    | 3.3385(1)    | 152           |

**Table S16.** Packing indexes for investigated compounds and their relatives

| compound       | packing index [%] |
|----------------|-------------------|
| $\alpha$ -2-DG | 69.3              |
| $\beta$ -2-DG  | 68.2              |
| 2-CG           | 71.3              |
| 2-BG           | 77.4              |
| 2-IG           | 71.8              |
| 2-CM           | 70.7              |
| 2-BM           | 73.5              |
| sucrose        | 76.3              |
| 4-BS           | 74.0              |

**Table S17.** Interaction energies (kJ mol<sup>-1</sup>) for adjacent molecules. Only molecules having a noticeable contribution (higher than 1.0 kJ mol<sup>-1</sup>) are included.

| Compound | N             | Symmetry operation | R             | $E_{ele}$ | $E_{pol}$ | $E_{dis}$ | $E_{rep}$ | $E_{tot}$ |
|----------|---------------|--------------------|---------------|-----------|-----------|-----------|-----------|-----------|
| 2-BG     | 2             | x+1/2, -y+1/2, -z  | 5.15          | -71.9     | -12.8     | -30.7     | 89.9      | -56.7     |
|          | 2             | x, y, z            | 6.88          | -58.3     | -12.2     | -23.7     | 84.3      | -39.3     |
|          | 2             | -x, y+1/2, -z+1/2  | 8.14          | -9.8      | -2.0      | -21.1     | 19.2      | -18.3     |
|          | 2             | -x, y+1/2, -z+1/2  | 5.93          | -10.6     | -2.3      | -20.9     | 18.5      | -19.8     |
|          | 2             | x, y, z            | 6.81          | -53.4     | -13.0     | -19.5     | 67.9      | -41.1     |
|          | 2             | x+1/2, -y+1/2, -z  | 8.58          | -0.4      | -0.3      | -3.3      | 0.9       | -2.9      |
|          | 2             | x+1/2, -y+1/2, -z  | 8.62          | -3.0      | -0.4      | -2.2      | 0.0       | -5.4      |
|          | 2             | x, y, z            | 9.68          | -4.7      | -0.3      | -1.0      | 0.0       | -6.1      |
|          | 1             | -x+1/2, -y, z+1/2  | 9.51          | -0.2      | -0.0      | -0.9      | 0.0       | -1.1      |
| 2-BM     | 1             | -                  | 12.11         | -0.9      | -0.1      | -0.3      | 0.0       | -1.3      |
|          | 1             | -                  | 10.19         | -1.2      | -0.1      | -1.2      | 0.0       | -2.5      |
|          | 0             | -x, y+1/2, -z      | 6.53          | -13.7     | -2.1      | -15.5     | 16.0      | -15.3     |
|          | 0             | -x, y+1/2, -z      | 6.72          | -61.1     | -10.5     | -21.6     | 90.4      | -2.8      |
|          | 1             | -                  | 7.04          | -44.8     | -11.4     | -14.3     | 53.6      | -16.9     |
|          | 1             | -                  | 6.44          | -38.6     | -9.7      | -30.4     | 63.4      | -15.3     |
|          | 1             | -                  | 6.41          | -45.3     | -10.4     | -23.2     | 71.9      | -7.0      |
|          | 0             | x, y, z            | 8.05          | -11.3     | -2.8      | -9.2      | 11.0      | -12.3     |
|          | 1             | -                  | 7.04          | -110.4    | -22.6     | -21.3     | 137.8     | -16.5     |
|          | 1             | -                  | 5.93          | -82.2     | -17.8     | -24.9     | 103.0     | -21.9     |
|          | 1             | -                  | 7.48          | -5.8      | -1.1      | -3.9      | 0.3       | -10.5     |
|          | 1             | -                  | 7.74          | -3.7      | -0.9      | -6.1      | 0.7       | -10       |
|          | 1             | -                  | 10.61         | -2.9      | -0.1      | -0.5      | 0.0       | -3.5      |
|          | 1             | -                  | 11.18         | -1.2      | -0.1      | -0.4      | 0.0       | -1.7      |
|          | 1             | -                  | 10.00         | -1.5      | -0.1      | -1.0      | 0.0       | -2.6      |
|          | 1             | -                  | 12.37         | -1.0      | -0.0      | -0.1      | 0.0       | -1.1      |
|          | 2             | -x, y+1/2, -z      | 5.99          | -44.9     | -12.2     | -30.8     | 55.8      | -32.1     |
|          | 2             | x, y, z            | 8.05          | -1.4      | -1.7      | -11.9     | 8.2       | -6.8      |
|          | 1             | -x, y+1/2, -z      | 16.35         | -1.1      | -0.0      | -0.0      | 0.0       | -1.1      |
|          | 2             | x, y, z            | 14.43         | -1.1      | -0.0      | -0.0      | 0.0       | -1.1      |
| 2        | x, y, z       | 10.37              | -4.4          | -0.2      | -0.4      | 0.0       | -5        |           |
| 2        | -x, y+1/2, -z | 7.24               | -6.2          | -1.7      | -8.7      | 5.1       | -11.5     |           |
| 2        | -x, y+1/2, -z | 15.84              | -1.3          | -0.0      | -0.0      | 0.0       | -1.3      |           |
| 2        | x, y, z       | 13.13              | -1.8          | -0.1      | -0.1      | 0.0       | -2        |           |
| 4-BS     | 2             | x, y, z            | 10.45         | -35.6     | -8.2      | -16.1     | 53.1      | -24.9     |
|          | 2             | -x, y+1/2, -z+1/2  | 9.37          | -9.4      | -1.1      | -11.7     | 14.5      | -12.0     |
|          | 2             | x+1/2, -y+1/2, -z  | 8.38          | -67.2     | -13.4     | -31.9     | 101.4     | -46.2     |
|          | 2             | -x, y+1/2, -z+1/2  | 6.41          | -86.8     | -16.7     | -56.6     | 105.0     | -88.5     |
|          | 2             | -x+1/2, -y, z+1/2  | 7.77          | -65.3     | -16.6     | -29.3     | 82.3      | -56.0     |
|          | 2             | x+1/2, -y+1/2, -z  | 8.30          | -97.6     | -24.4     | -31.7     | 120.7     | -74.3     |
|          | 2             | -x+1/2, -y, z+1/2  | 11.09         | -8.2      | -2.1      | -11.6     | 7.7       | -15.6     |
|          | 2             | -x+1/2, -y, z+1/2  | 9.93          | -0.4      | -0.1      | -2.2      | 0.0       | -2.4      |
|          | 2             | -x, y+1/2, -z+1/2  | 14.59         | -1.8      | -0.1      | -0.6      | 0.0       | -2.4      |
|          | 2             | x+1/2, -y+1/2, -z  | 12.68         | -0.7      | -0.0      | -0.6      | 0.0       | -1.2      |
|          | 2             | x, y, z            | 12.56         | -1.9      | -0.1      | -0.7      | 0.0       | -2.8      |
|          | 2             | -x+1/2, -y, z+1/2  | 12.69         | -0.8      | -0.0      | -0.5      | 0.0       | -1.4      |
|          | Sucrose       | 2                  | -x, y+1/2, -z | 7.22      | -78.4     | -17.5     | -48.3     | 104.4     |
| 2        |               | -x, y+1/2, -z      | 9.82          | -3.7      | -0.9      | -12.1     | 10.4      | -8.7      |

|  |   |               |       |        |       |       |       |       |
|--|---|---------------|-------|--------|-------|-------|-------|-------|
|  | 2 | x, y, z       | 8.72  | -7.3   | -1.7  | -17.5 | 12.9  | -16.2 |
|  | 2 | -x, y+1/2, -z | 7.44  | -61.9  | -15.6 | -36.0 | 63.9  | -68.8 |
|  | 2 | x, y, z       | 7.77  | -110.8 | -28.0 | -32.8 | 121.8 | -91.2 |
|  | 2 | -x, y+1/2, -z | 7.86  | -42.9  | -10.1 | -29.2 | 61.3  | -40.4 |
|  | 2 | x, y, z       | 10.86 | -3.0   | -0.5  | -1.8  | 0.0   | -5.1  |
|  | 2 | x, y, z       | 11.68 | 0.8    | -0.3  | -3.7  | 0.7   | -2.1  |
|  | 2 | -x, y+1/2, -z | 13.03 | -1.7   | -0.1  | -0.4  | 0.0   | -2.3  |
|  | 2 | x, y, z       | 11.85 | -1.9   | -0.1  | -0.7  | 0.0   | -2.6  |
|  | 2 | -x, y+1/2, -z | 11.34 | -0.2   | -0.2  | -1.1  | 0.0   | -1.3  |

**Table S18.** Conformational analysis of the brominated analogues of 2-DG in an aqueous solution and in the solid state compared to parent compounds

| Comp.                       | Crystal state             |         |                |                           |                        | Aqueous solution          |      |                |     |                | anomeric equilibrium ( $\alpha/\beta$ ) [%] |                                                                       |
|-----------------------------|---------------------------|---------|----------------|---------------------------|------------------------|---------------------------|------|----------------|-----|----------------|---------------------------------------------|-----------------------------------------------------------------------|
|                             | Torsion angle             |         | H...H distance |                           |                        | Torsion angle             |      | H...H distance |     |                |                                             | C5-C6 (gt/tg)<br>O6-H6 (g/t) <sup>c</sup><br>rotameric equilibria [%] |
|                             | angle                     | [°]     | H...H          | [Å]                       | C5-C6 / O6-H6 rotamers | angle <sup>b</sup>        | [°]  | H...H          | [Å] |                |                                             |                                                                       |
| $\alpha$ -2-BG              | H1-C1-C2-H2               | -       | -              | -                         | -                      | H1-C1-C2-H2               | +63  | H1 H2          | 2.5 | 42/48/10<br>nd | 34/66                                       |                                                                       |
|                             | H2-C2-C3-H3               |         |                |                           |                        | H2-C2-C3-H3               | +172 | H1 H3          | 3.4 |                |                                             |                                                                       |
|                             | H3-C3-C4-H4               |         |                |                           |                        | H3-C3-C4-H4               | -176 |                |     |                |                                             |                                                                       |
|                             | H4-C4-C5-H5               |         |                |                           |                        | H4-C4-C5-H5               | +180 |                |     |                |                                             |                                                                       |
|                             | H5-C5-C6-H6               |         |                |                           |                        | H5-C5-C6-H6               | nd   |                |     |                |                                             |                                                                       |
|                             | H5-C5-C6-H6'              |         |                |                           |                        | H5-C5-C6-H6'              | nd   |                |     |                |                                             |                                                                       |
|                             | O5-C5-C6-O6 ( $\omega$ )  |         |                |                           |                        | O5-C5-C6-O6 ( $\omega$ )  | -    |                |     |                |                                             |                                                                       |
|                             | C5-C6-O6-H06 ( $\theta$ ) |         |                |                           |                        | C5-C6-O6-H06 ( $\theta$ ) | -    |                |     |                |                                             |                                                                       |
| $\beta$ -2-BG               | H1-C1-C2-H2               | +177.55 | H1 H2          | 2.90                      | <i>gg/gauche</i>       | H1-C1-C2-H2               | -175 | H1 H2          | 2.8 | 55/35/11<br>nd |                                             |                                                                       |
|                             | H2-C2-C3-H3               | -156.82 | H1 H3          | 2.90                      |                        | H2-C2-C3-H3               | +178 | H1 H3          | 2.4 |                |                                             |                                                                       |
|                             | H3-C3-C4-H4               | +157.40 | H1 H4          | 3.90                      |                        | H3-C3-C4-H4               | +174 | H1 H4          | 3.4 |                |                                             |                                                                       |
|                             | H4-C4-C5-H5               | +177.03 | H1 H5          | 2.10                      |                        | H4-C4-C5-H5               | +180 | H1 H5          | 2.2 |                |                                             |                                                                       |
|                             | H5-C5-C6-H6               | +43.74  | H2 H3          | 2.96                      |                        | H5-C5-C6-H6               | nd   | H2 H3          | 2.5 |                |                                             |                                                                       |
|                             | H5-C5-C6-H6'              | -71.15  | H2 H5          | 3.66                      |                        | H5-C5-C6-H6'              | nd   | H2 H5          | 3.1 |                |                                             |                                                                       |
|                             | O5-C5-C6-O6 ( $\omega$ )  | -63.92  | H3 H5          | 2.61                      |                        | O5-C5-C6-O6 ( $\omega$ )  | -    | H3 H5          | 2.3 |                |                                             |                                                                       |
|                             | C5-C6-O6-H06 ( $\theta$ ) | +151.95 | H4 H5          | 2.92                      |                        | C5-C6-O6-H06 ( $\theta$ ) | -    | H4 H5          | 2.5 |                |                                             |                                                                       |
| $\alpha$ -2-BM              | H1-C1-C2-H2               | -53.86  | H1 H2          | 2.36                      | <i>gg/trans</i>        | H1-C1-C2-H2               | -75  | H1 H2          | 2.5 | 50/46/4<br>nd  | 47/53                                       |                                                                       |
|                             | H2-C2-C3-H3               | -55.92  | H2 H3          | 2.41                      |                        | H2-C2-C3-H3               | -53  | H2 H3          | 2.4 |                |                                             |                                                                       |
|                             | H3-C3-C4-H4               | +173.65 | H3 H5          | 2.52                      |                        | H3-C3-C4-H4               | +174 | H3 H5          | 2.4 |                |                                             |                                                                       |
|                             | H4-C4-C5-H5               | -174.93 |                |                           |                        | H4-C4-C5-H5               | +174 |                |     |                |                                             |                                                                       |
|                             | H5-C5-C6-H6               | +75.46  |                |                           |                        | H5-C5-C6-H6               | nd   |                |     |                |                                             |                                                                       |
|                             | H5-C5-C6-H6'              | -58.76  |                |                           |                        | H5-C5-C6-H6'              | nd   |                |     |                |                                             |                                                                       |
|                             | O5-C5-C6-O6 ( $\omega$ )  | -176.11 |                |                           |                        | O5-C5-C6-O6 ( $\omega$ )  | -    |                |     |                |                                             |                                                                       |
|                             | C5-C6-O6-H06 ( $\theta$ ) | -132.22 |                |                           |                        | C5-C6-O6-H06 ( $\theta$ ) | -    |                |     |                |                                             |                                                                       |
| $\beta$ -2-BM               | H1-C1-C2-H2               | +70.84  | H1 H2          | 2.48                      | <i>gg/cis</i>          | H1-C1-C2-H2               | +70  | H1 H2          | 2.4 | 60/30/10<br>nd |                                             |                                                                       |
|                             | H2-C2-C3-H3               | -57.23  | H1 H3          | 2.75                      |                        | H2-C2-C3-H3               | -53  | H1 H3          | 2.4 |                |                                             |                                                                       |
|                             | H3-C3-C4-H4               | +158.32 | H1 H5          | 2.30                      |                        | H3-C3-C4-H4               | -175 | H1 H5          | 2.3 |                |                                             |                                                                       |
|                             | H4-C4-C5-H5               | -164.49 | H2 H3          | 2.79                      |                        | H4-C4-C5-H5               | -179 | H2 H3          | 2.3 |                |                                             |                                                                       |
|                             | H5-C5-C6-H6               | +52.90  | H3 H5          | 2.75                      |                        | H5-C5-C6-H6               | nd   | H3 H5          | 2.5 |                |                                             |                                                                       |
|                             | H5-C5-C6-H6'              | -42.28  | H5 H6          | 2.39                      |                        | H5-C5-C6-H6'              | nd   | H5 H6          | 2.5 |                |                                             |                                                                       |
|                             | O5-C5-C6-O6 ( $\omega$ )  | -62.84  | H5 H6'         | 2.46                      |                        | O5-C5-C6-O6 ( $\omega$ )  | -    | H5 H6'         | 3.1 |                |                                             |                                                                       |
|                             | C5-C6-O6-H06 ( $\theta$ ) | -130.30 | H6 H6'         | 1.48                      |                        | C5-C6-O6-H06 ( $\theta$ ) | -    | H6 H6'         | 1.8 |                |                                             |                                                                       |
| $\alpha$ -2-DG <sup>c</sup> | H1-C1-C2-H2               | -68.7   | H1 H2          | 2.41                      | <i>gt<sup>a</sup></i>  | H1-C1-C2-H2               | +58  | H1 H2          | 2.5 | 45/45/10<br>nd | 49/51                                       |                                                                       |
|                             | H1-C1-C2-H2'              | +49.0   | H1 H2'         | 2.30                      |                        | H1-C1-C2-H2'              | nd   | H1 H2'         | 2.5 |                |                                             |                                                                       |
|                             | H2-C2-C3-H3               | -52.9   | H2 H2'         | 1.60                      |                        | H2-C2-C3-H3               | -56  | H2 H2'         | 1.8 |                |                                             |                                                                       |
|                             | H2'-C2-C3-H3              | -170.6  | H2 H3          | 2.33                      |                        | H2'-C2-C3-H3              | +180 | H2 H3          | 2.5 |                |                                             |                                                                       |
|                             | H3-C3-C4-H4               | +175.0  | H2' H4         | 2.61                      |                        | H3-C3-C4-H4               | -175 | H2' H4         | 2.6 |                |                                             |                                                                       |
|                             | H4-C4-C5-H5               | -178.6  | H3 H5          | 2.53                      |                        | H4-C4-C5-H5               | -179 | H3 H5          | 2.5 |                |                                             |                                                                       |
|                             | H5-C5-C6-H6               | +85.0   | H6 H6'         | 1.60                      |                        | H5-C5-C6-H6               | nd   | H6 H6'         | 1.8 |                |                                             |                                                                       |
|                             | H5-C5-C6-H6'              | -157.1  |                |                           |                        | H5-C5-C6-H6'              | nd   |                |     |                |                                             |                                                                       |
| O5-C5-C6-O6 ( $\omega$ )    | +81.9                     |         |                | O5-C5-C6-O6 ( $\omega$ )  | -                      |                           |      |                |     |                |                                             |                                                                       |
| C5-C6-O6-H06 ( $\theta$ )   | -119.6                    |         |                | C5-C6-O6-H06 ( $\theta$ ) | -                      |                           |      |                |     |                |                                             |                                                                       |
| $\beta$ -2-DG <sup>c</sup>  | H1-C1-C2-H2               | +54.8   | H1 H2          | 2.43                      | <i>gg/trans</i>        | H1-C1-C2-H2               | +59  | H1 H2          | 2.4 | 60/30/10<br>nd |                                             |                                                                       |
|                             | H1-C1-C2-H2'              | +174.9  | H1 H2'         | 3.03                      |                        | H1-C1-C2-H2'              | +179 | H1 H2'         | 3.4 |                |                                             |                                                                       |
|                             | H2-C2-C3-H3               | -51.1   | H1 H3          | 2.65                      |                        | H2-C2-C3-H3               | -56  | H1 H3          | 2.4 |                |                                             |                                                                       |
|                             | H2'-C2-C3-H3              | -170.7  | H1 H5          | 2.39                      |                        | H2'-C2-C3-H3              | +180 | H1 H5          | 2.2 |                |                                             |                                                                       |
|                             | H3-C3-C4-H4               | +170.6  | H2 H2'         | 1.76                      |                        | H3-C3-C4-H4               | -175 | H2 H2'         | 1.8 |                |                                             |                                                                       |
|                             | H4-C4-C5-H5               | -177.1  | H2 H3          | 2.39                      |                        | H4-C4-C5-H5               | -179 | H2 H3          | 2.4 |                |                                             |                                                                       |
|                             | H5-C5-C6-H6               | +58.0   | H2' H4         | 2.66                      |                        | H5-C5-C6-H6               | nd   | H2' H4         | 2.5 |                |                                             |                                                                       |
|                             | H5-C5-C6-H6'              | -61.8   | H4 H6          | 3.12                      |                        | H5-C5-C6-H6'              | nd   | H4 H6          | 2.5 |                |                                             |                                                                       |
| O5-C5-C6-O6 ( $\omega$ )    | -64.8                     | H5 H6   | 2.42           | O5-C5-C6-O6 ( $\omega$ )  | -                      | H5 H6                     | 2.2  |                |     |                |                                             |                                                                       |
| C5-C6-O6-H06 ( $\theta$ )   | +157.4                    | H5 H6'  | 2.45           | C5-C6-O6-H06 ( $\theta$ ) | -                      | H5 H6'                    | 2.5  |                |     |                |                                             |                                                                       |
|                             |                           | H6 H6'  | 1.77           |                           |                        | H6 H6'                    | 1.8  |                |     |                |                                             |                                                                       |

<sup>a</sup> conformation between cis and trans conformers

<sup>b</sup> for torsion angles H5-C5-C6-H6 and H5-C5-C6-H6' their values could not be determined for the each rotamer using available NMR data. In the case of  $\omega$  angle following values were assumed:  $-60^\circ (\pm 5)$ ,  $-60^\circ (\pm 5)$ ,  $-180^\circ (\pm 5)$  for the rotamers *gg*, *gt*, *tg*, respectively. The value of  $\theta$  was assumed to be either  $60^\circ$  or  $180^\circ (\pm)$  for *cis* and *gauche* conformers respectively.

<sup>c</sup> data taken from [ziemniak 2021]

**Table S19.** <sup>1</sup>H-<sup>13</sup>C HSQC and <sup>1</sup>H NMR data for halogenated analogues of 2-DG and the parental compound. NMR shifts values are measured in ppm and *J*-coupling constants in Hz

| Compound | H1; C1<br><i>J</i> <sub>1,2</sub> | H2; C2<br><i>J</i> <sub>2,3</sub> | H3; C3<br><i>J</i> <sub>3,4</sub> | H4; C4<br><i>J</i> <sub>4,5</sub> | H5; C5<br><i>J</i> <sub>5,6R</sub> ; <i>J</i> <sub>5,6S</sub> | H6; H6'; C6<br><i>J</i> <sub>6,6</sub> |
|----------|-----------------------------------|-----------------------------------|-----------------------------------|-----------------------------------|---------------------------------------------------------------|----------------------------------------|
| α-2-BG   | 5.27; 94.27<br>3.3                | 3.96; 54.81<br>10.8               | 3.76; 74.83<br>9.3                | 3.34; 72.75<br>10.0               | 3.92; 73.94<br>5.2; 2.4                                       | 3.52-3.68<br>nd                        |
| β-2-BG   | 4.81; 97.48<br>8.7                | 3.42; 57.54<br>9.9                | 3.72; 78.36<br>9.6                | 3.18; 72.38<br>9.8                | 3.52; 78.00<br>6.1; 2.3                                       | 3.52-3.68<br>nd                        |
| α-2-BM   | 5.35; 96.12<br>1.3                | 4.18; 57.47<br>3.8                | 3.98; 70.40<br>9.5                | 3.53; 69.33<br>15.1               | 3.90; 75.13<br>5.7; 2.3                                       | 3.53-3.80<br>nd                        |
| β-2-BM   | 93.58; 4.81<br>1.2                | 4.43; 62.09<br>3.6                | 3.70; 73.40<br>9.4                | 3.44; 68.99<br>9.6                | 3.22; 78.88<br>6.7; 2.5                                       | 3.53-3.80<br>nd                        |

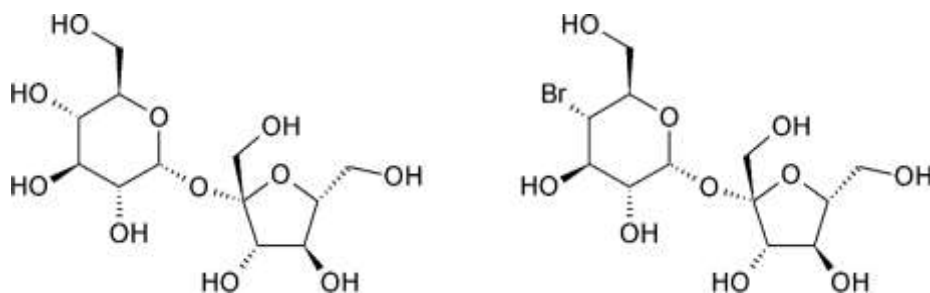

**Scheme S1.** Structural formulae of sucrose (left) and 4-BM (right).

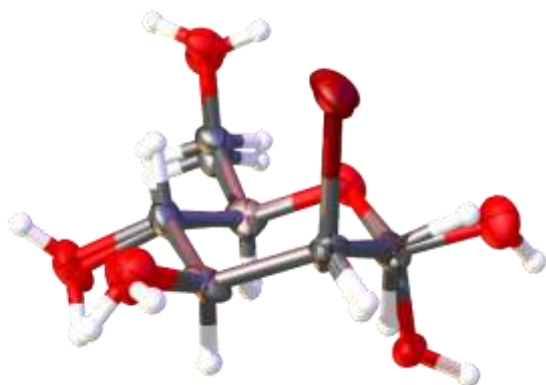

**Figure S1.** Superimposed structures of 2-BG molecules existing in its asymmetric unit (RMSD = 0.494).

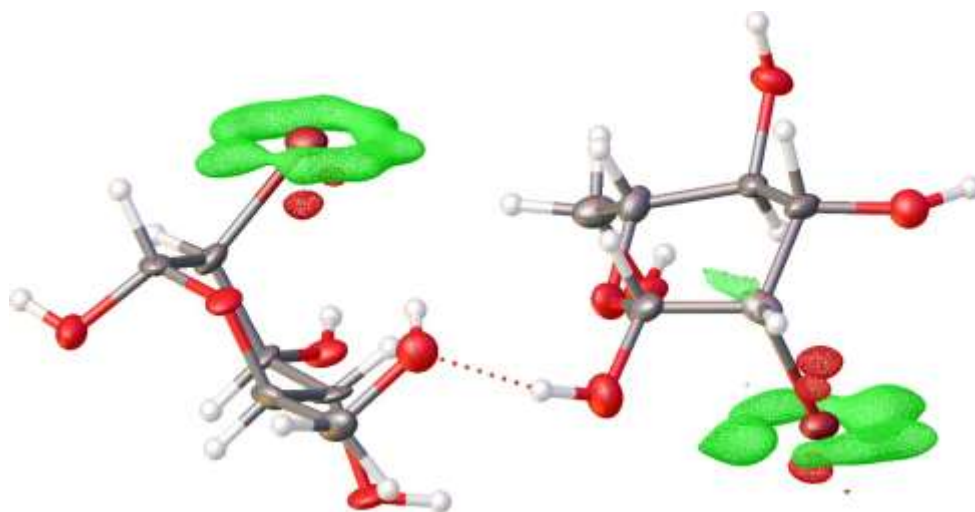

**Figure S2.** Residual experimental density for 2-BM



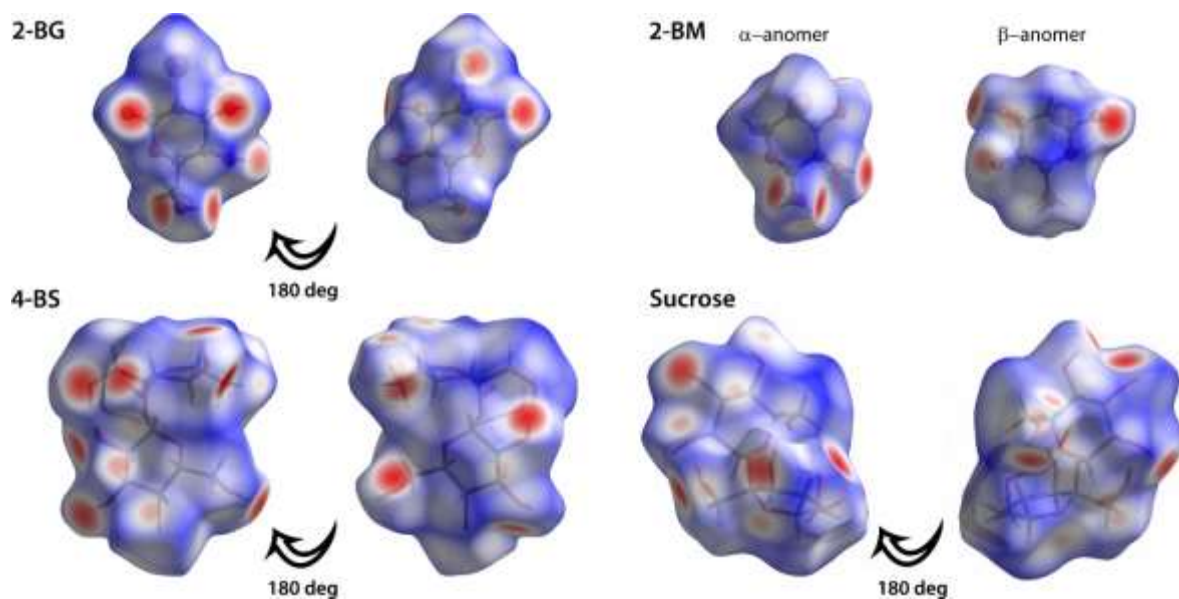

**Figure S3.** Hirshfeld surfaces mapped onto  $d_e$ . Intermolecular contacts which are closer than the sum of their Van der Waals radii are highlighted in red on the surface, whereas longer contacts are blue. Contacts having similar lengths to the radii sum are depicted as white.

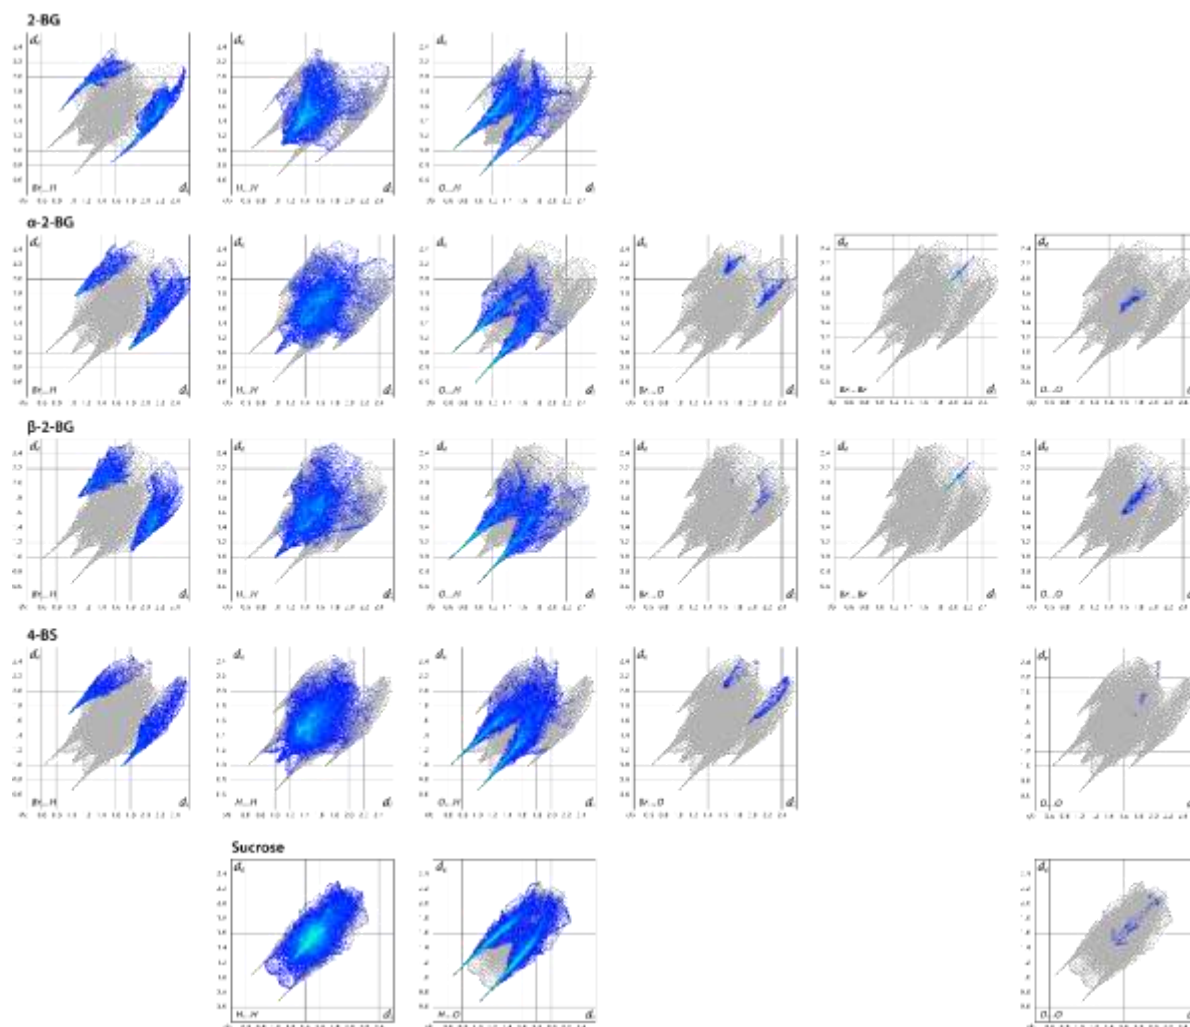

**Figure S4.** Contribution of different X-X contacts for each crystal lattice discussed in the article.

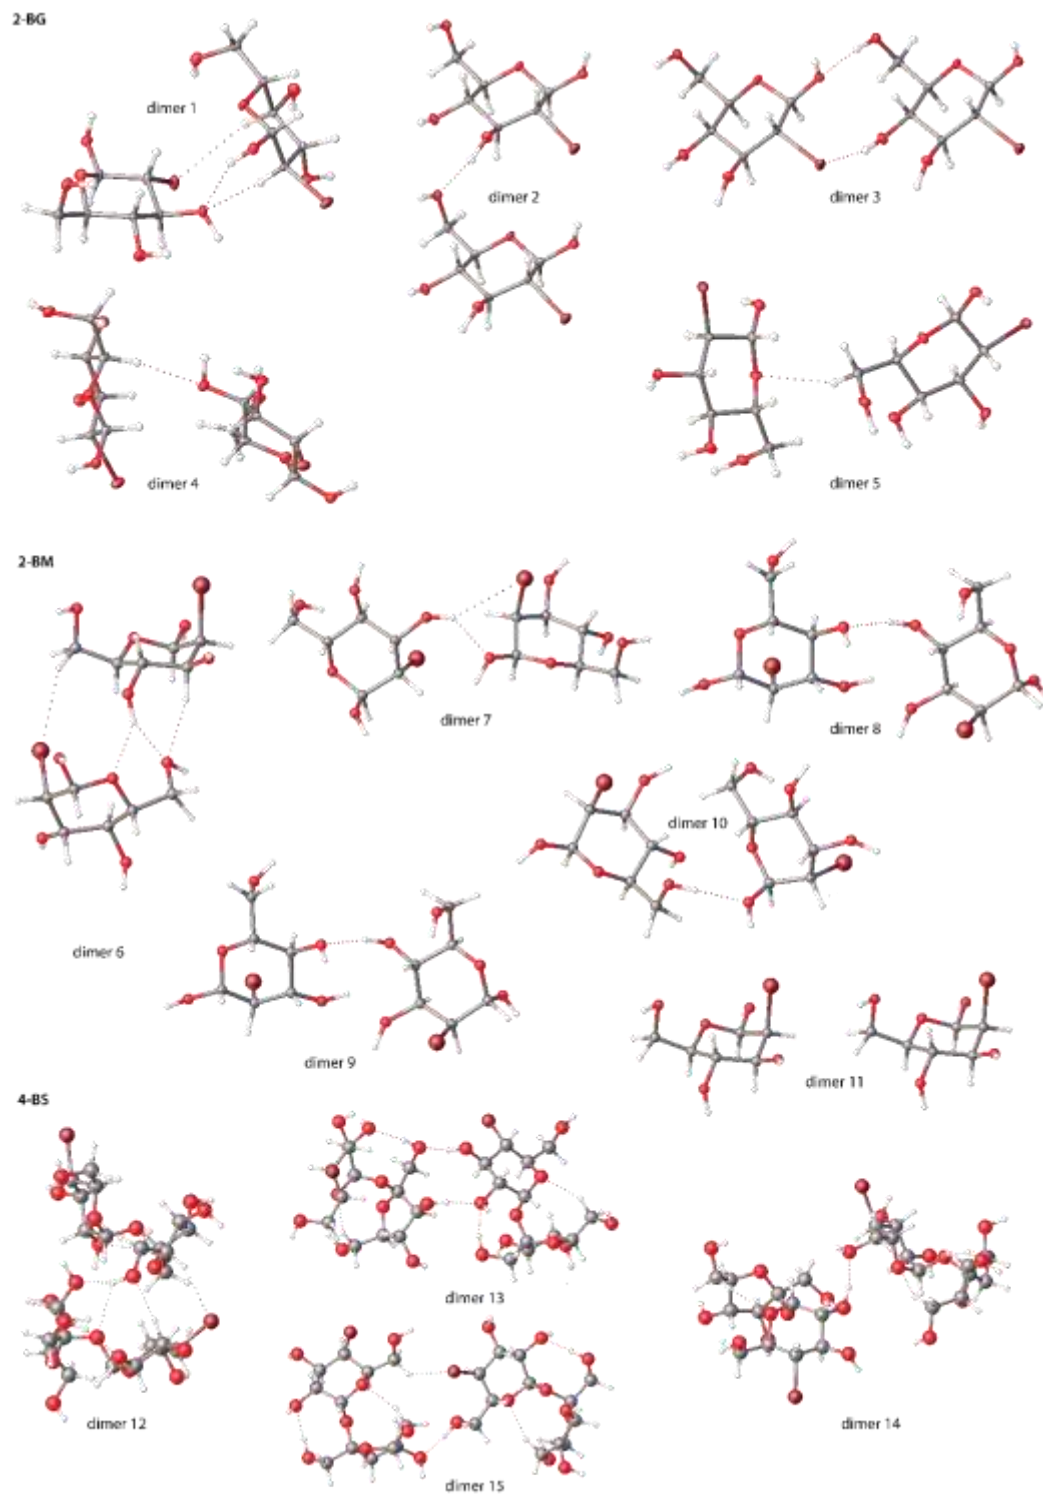

**Figure S5.** Dimers of 2-BG, 2-BM and 4-BS discussed in the text

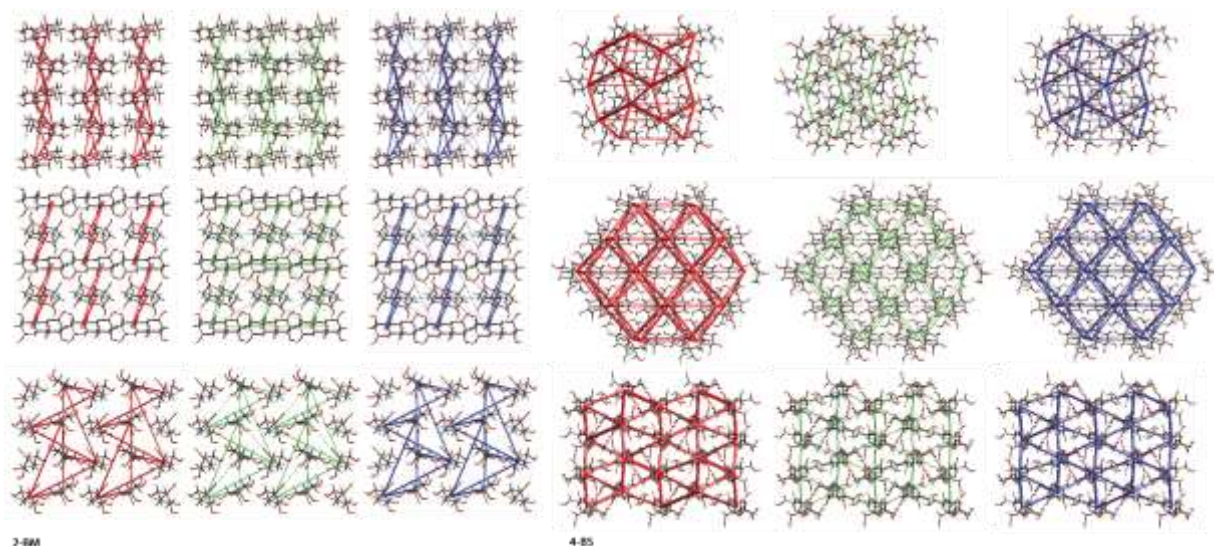

**Figure S6.** Energy frameworks for **2-BM** and **4-BS** crystals viewed along axes *a* (top), *b* (middle) and *c* (bottom) showing electrostatic (red) and dispersion (green) components, and the total interaction energy (blue).

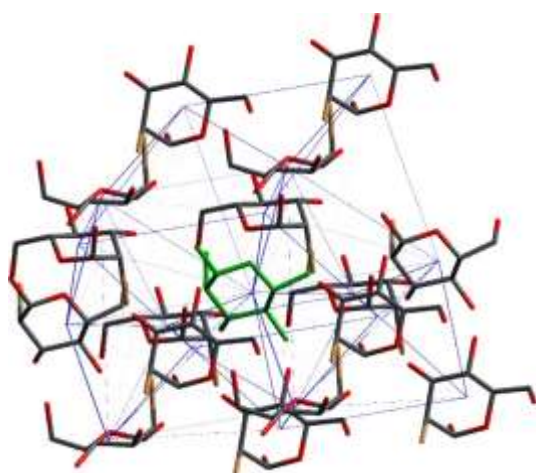

**Figure S7.** Energy framework of total interaction energy for a small cluster of 2-BM molecules. Weaker interactions are also included and the cut-off is  $3.0 \text{ kJ mol}^{-1}$

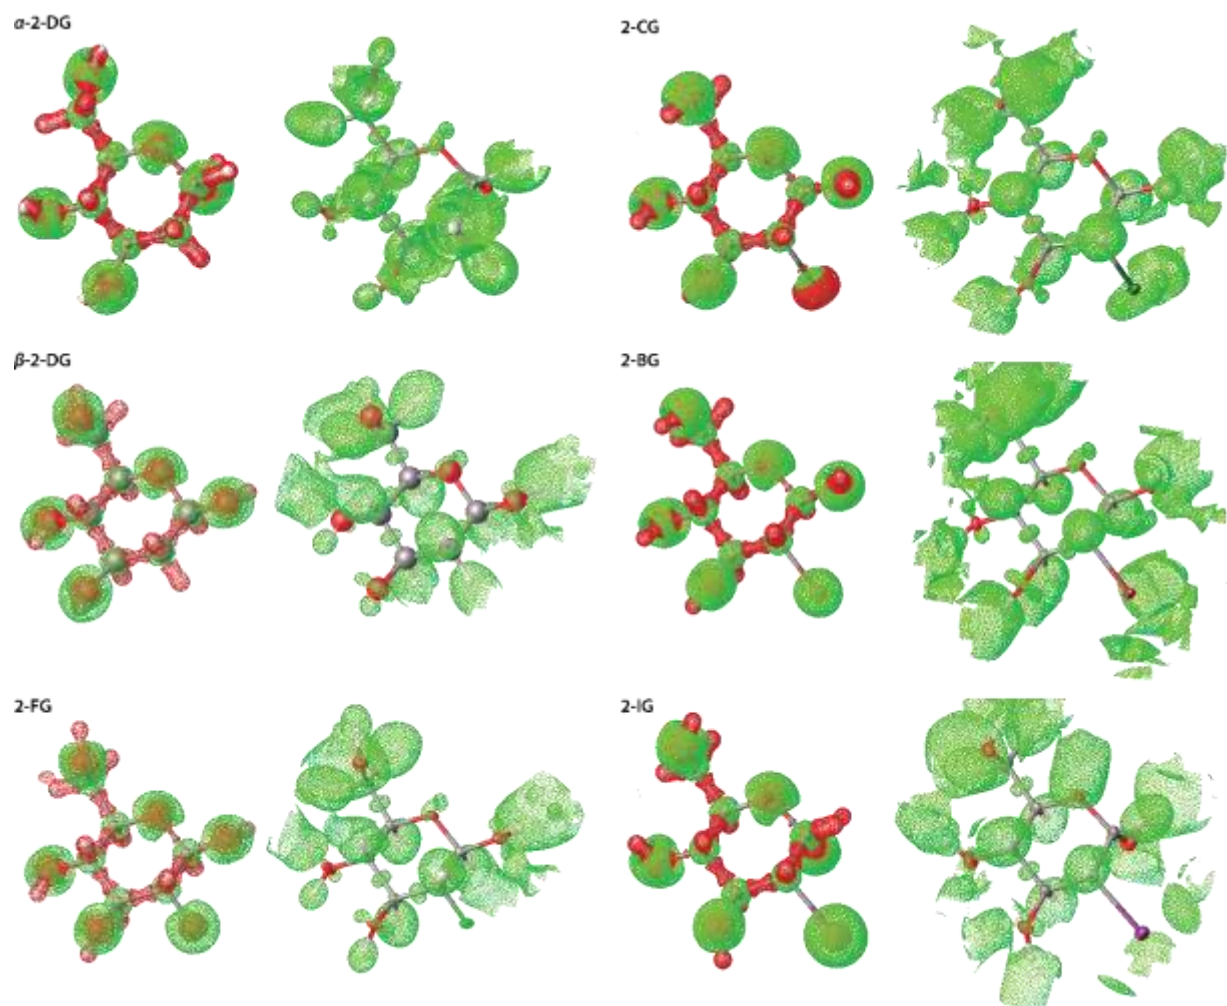

**Figure S8.** ED Laplacian and ELI for selected dimers of 2-DG and its halogenated derivatives. Contour levels are  $0.8 e \text{ \AA}^{-5}$  and  $2.2 Y_D$  for Laplacian and ELI-D respectively.



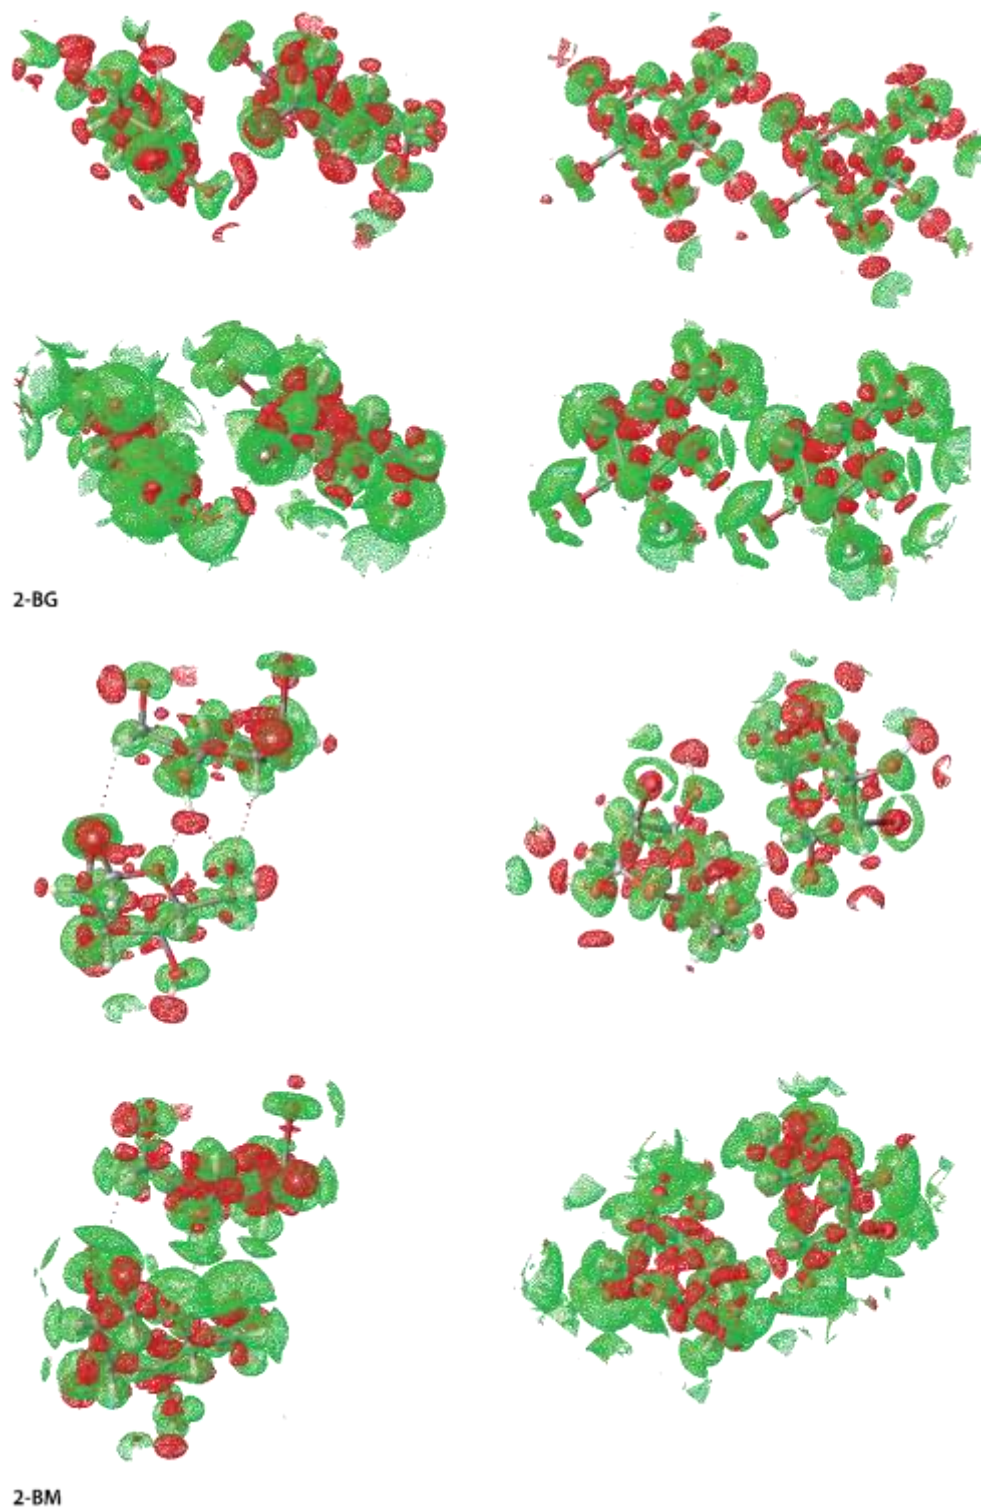

**Figure S9.** Experimental (top) and static (bottom) deformation densities isosurfaces for selected dimers of **2-BM** and **2-BG**. Contour level is  $0.095 e \text{ \AA}^{-3}$  for both density maps.
